# Supplementary material for: Differentially Represented Proteins in Response to Infection with Mycobacterium tuberculosis Identified by Quantitative Serum Proteomics in Asian Elephants
Source: MDPI journal article supplement (doi:10.3390/pathogens11091010), 2022-09-03
Supplement: s1 [file s1]

## **Supplementary Information**

**Additional file 2. Analysis of immunoglobulin proteins differentially represented in TB+ elephants when compared to TB- animals.**

**Additional file 3. Gene Ontology (GO) annotations for non-immunoglobulin proteins.**

**Additional file 4. Most significant pathways identified by Reactome analysis of non-immunoglobulin proteins.**

**Additional file 5. Protein sequence alignment between *M. tuberculosis* P9WVK5|ESXB\_MYCTU ESAT-6-like protein EsxB and identified mycobacterial proteins with predicted antigen binding regions to immunoglobulin proteins.**

## Additional file 2. Analysis of immunoglobulin proteins differentially represented in TB+ elephants when compared to TB- animals.

### Analytical workflow

1. Select immunoglobulin protein sequences differentially represented in TB+ elephants when compared to TB- animals.
2. Paratome (<http://www.ofranlab.org>) identification of antigen binding regions.
3. Protein BLAST sequence alignment of identified antigen binding regions against *Mycobacterium* (taxid: 1763) using compositional matrix adjustment ([https://blast.ncbi.nlm.nih.gov/Blast.cgi?PROGRAM=blastp&PAGE\\_TYPE=BlastSearch&LINK\\_LOC=blasthome](https://blast.ncbi.nlm.nih.gov/Blast.cgi?PROGRAM=blastp&PAGE_TYPE=BlastSearch&LINK_LOC=blasthome)) to select identifications with highest E-value.

### Ig proteins overrepresented in TB+ elephants

#### G3TYG4

No Blast hits in Paratome. Introduced into the GO annotations and Reactome analysis below.

#### G3UMK9

No Blast hits in Paratome. Introduced into the GO annotations and Reactome analysis below.

#### G3UDI6

paratome\_1\_tr\_G3UDI6\_G3UDI6\_LOXAF\_Ig\_like\_domain\_containing\_protein\_OS\_Loxodonta\_africana\_OX\_9785\_PE\_4\_SV\_1

#### ABR H1: SSISSANYGWS (19-29)

RID: 62CNE2PV016

Job Title:H1

Program: BLASTP

Query: H1 ID: lcl|Query\_61178(amino acid) Length: 11

Database: nr All non-redundant GenBank CDS

translations+PDB+SwissProt+PIR+PRF excluding environmental samples from WGS projects

#### Sequences producing significant alignments:

| Description                                                         | Scientific Name | Common Name | Taxid | Max Score | Total Score | Query cover | E Value | Per. Ident | Acc. Len |
|---------------------------------------------------------------------|-----------------|-------------|-------|-----------|-------------|-------------|---------|------------|----------|
| DUF3298 domain-containing protein [Mycobacterium sp.]<br>TAM68061.1 | Mycobacteriu... | NA          | 1785  | 24.4      | 24.4        | 63%         | 52      | 100.00     | 264      |

#### Alignments:

>DUF3298 domain-containing protein [Mycobacterium sp.]

Sequence ID: TAM68061.1 Length: 264

Range 1: 97 to 103

Score:24.4 bits(50), Expect:52,  
Method:  
Identities:7/7(100%), Positives:7/7(100%), Gaps:0/7(0%)

Query 3 SSISSANYG 9  
Sbjct 97 SSISSANYG 103

#### ABR H2: WLGRGYYSGSSWNRNYGS (41-58)

RID: 62D0UFAP016

Job Title:H2

Program: BLASTP

Query: H2 ID: lcl|Query\_44192(amino acid) Length: 18

Database: nr All non-redundant GenBank CDS

translations+PDB+SwissProt+PIR+PRF excluding environmental samples from WGS projects

### Sequences producing significant alignments:

| Description                                                                                 | Scientific Name | Common Name | Taxid | Max Score | Total Score | Query cover | E Value | Per. Ident | Acc. Len |
|---------------------------------------------------------------------------------------------|-----------------|-------------|-------|-----------|-------------|-------------|---------|------------|----------|
| Accession<br>FkbM family methyltransferase [Mycobacterium intracellulare]<br>WP_020822873.1 | Mycobacteriu... | NA          | 1767  | 27.4      | 27.4        | 77%         | 15      | 64.29      | 234      |

### Alignments:

```
>FkbM family methyltransferase [Mycobacterium intracellulare]
Sequence ID: WP_020822873.1 Length: 234
>hypothetical protein OEM_30260 [Mycobacterium intracellulare
subsp. yongonense 05-1390]
Sequence ID: AGP64561.1 Length: 234
>hypothetical protein MOTT12_03025 [Mycobacterium
intracellulare subsp. yongonense]
Sequence ID: ARR78689.1 Length: 234
>FkbM family methyltransferase [Mycobacterium intracellulare
subsp. chimaera]
Sequence ID: ASL15902.1 Length: 234
>FkbM family methyltransferase [Mycobacterium intracellulare
subsp. chimaera]
Sequence ID: PBA56158.1 Length: 234
```

Range 1: 9 to 20

Score:27.4 bits(57), Expect:15,  
Method:  
Identities:9/14(64%), Positives:9/14(64%), Gaps:2/14(14%)

```
Query 1 WLGRGYSGSSWNR 14
      WL R YYS WNR
Sbjct 9 WL-R-YYSDRNWNR 20
```

Could not find ABR3

### G3UKC4

paratome\_1\_tr\_G3UKC4\_G3UKC4\_LOXAF\_Ig\_like\_domain\_containing\_protein\_OS\_Loxodonta\_afri  
cana\_OX\_9785\_PE\_4\_SV\_1  
Could not find ABR1

### ABR H2: WMGGIYPGDSBTCY (66-79)

RID: 62DVU5AF016

Job Title:H2

Program: BLASTP

Query: H2 ID: lcl|Query\_96500(amino acid) Length: 14

Database: nr All non-redundant GenBank CDS

translations+PDB+SwissProt+PIR+PRF excluding environmental samples from WGS projects

### Sequences producing significant alignments:

| Description                                                                                    | Scientific Name | Common Name | Taxid  | Max Score | Total Score | Query cover | E Value | Per. Ident | Acc. Len |
|------------------------------------------------------------------------------------------------|-----------------|-------------|--------|-----------|-------------|-------------|---------|------------|----------|
| Accession<br>TetR/AcrR family transcriptional regulator [Mycobacterium goodii]<br>MBU8811282.1 | Mycobacteriu... | NA          | 134601 | 27.8      | 27.8        | 71%         | 5.5     | 70.00      | 207      |
| DUF2617 family protein [Mycobacterium asiaticum]<br>WP_065128554.1                             | Mycobacteriu... | NA          | 1790   | 27.8      | 27.8        | 64%         | 5.5     | 77.78      | 164      |

### Alignments:

```
>TetR/AcrR family transcriptional regulator [Mycobacterium
goodii]
Sequence ID: MBU8811282.1 Length: 207
>TetR/AcrR family transcriptional regulator [Mycobacterium
goodii]
Sequence ID: MBU8817019.1 Length: 207
>TetR/AcrR family transcriptional regulator [Mycobacterium
goodii]
Sequence ID: MBU8830908.1 Length: 207
```

Range 1: 194 to 203

Score:27.8 bits(58), Expect:5.5,  
Method:  
Identities:7/10(70%), Positives:8/10(80%), Gaps:0/10(0%)

Query 1 WMGGIYPGDS 10  
WMC IY G+S  
Sbjct 194 WMGAIYAGES 203

>DUF2617 family protein [Mycobacterium asiaticum]  
Sequence ID: WP\_065128554.1 Length: 164  
>hypothetical protein A5645\_05960 [Mycobacterium asiaticum]  
Sequence ID: OBK97578.1 Length: 164  
Range 1: 115 to 123

Score:27.8 bits(58), Expect:5.5,  
Method:  
Identities:7/9(78%), Positives:9/9(100%), Gaps:0/9(0%)

Query 1 WMGGIYPGD 9  
W+GGI+PGD  
Sbjct 115 WLGGIYPGD 123

Could not find ABR3

## G3TUN8

paratome\_1\_tr\_G3TUN8\_G3TUN8\_LOXAF\_Ig\_like\_domain\_containing\_protein\_OS\_Loxodonta\_afri  
ana\_OX\_9785\_PE\_4\_SV\_1

## ABR H1: PSWVLSQVTLKESGPGLIKPSQTLSLTCTVSGFSLSTSGVGVS (14-56)

No significant similarity found.

## ABR H2: WLALIYWDDDKRYSS (68-82)

RID: 62VY1CXE016  
Job Title:H2  
Program: BLASTP  
Query: H2 ID: lcl|Query\_82580(amino acid) Length: 15  
Database: nr All non-redundant GenBank CDS  
translations+PDB+SwissProt+PIR+PRF excluding environmental samples from WGS  
projects

### Sequences producing significant alignments:

| Description                                                                                      | Scientific Name | Common Name        | Taxid   | Max Score | Total Score | Query cover | E Value | Per. Ident | Acc. Len |
|--------------------------------------------------------------------------------------------------|-----------------|--------------------|---------|-----------|-------------|-------------|---------|------------|----------|
| Accession<br>TetR/AcrR family transcriptional regulator [Mycobacterium simiae]<br>WP_149655796.1 |                 | Mycobacteriu... NA | 1784    | 27.4      | 27.4        | 60%         | 9.3     | 66.67      | 186      |
| PE-PPE domain-containing protein [Mycobacterium palauense]<br>WP_099021260.1                     |                 | Mycobacteriu... NA | 2034511 | 27.4      | 27.4        | 66%         | 9.3     | 80.00      | 656      |
| DinB family protein [Mycobacterium tuberculosis]<br>MBZ4317686.1                                 |                 | Mycobacteriu... NA | 1773    | 26.9      | 26.9        | 46%         | 13      | 85.71      | 78       |

### Alignments:

>TetR/AcrR family transcriptional regulator [Mycobacterium  
simiae]  
Sequence ID: WP\_149655796.1 Length: 186  
>TetR/AcrR family transcriptional regulator [Mycobacterium  
simiae]  
Sequence ID: KAA1248348.1 Length: 186  
Range 1: 157 to 168

Score:27.4 bits(57), Expect:9.3,  
Method:  
Identities:8/12(67%), Positives:8/12(66%), Gaps:3/12(25%)

Query 2 LALIYW---DDD 10  
L LIYW DDD  
Sbjct 157 LSLIYWPGEDDD 168

>PE-PPE domain-containing protein [Mycobacterium palauense]  
Sequence ID: WP\_099021260.1 Length: 656  
Range 1: 477 to 485

Score:27.4 bits(57), Expect:9.3,  
Method:  
Identities:8/10(80%), Positives:8/10(80%), Gaps:1/10(10%)

Query 1 WLALIYWDDD 10  
WLAL WDDD  
Sbjct 477 WLAL-HWDDD 485

>DinB family protein [Mycobacterium tuberculosis]

Sequence ID: MBZ4317686.1 Length: 78

Range 1: 25 to 31

Score:26.9 bits(56), Expect:13,  
Method:  
Identities:6/7(86%), Positives:7/7(100%), Gaps:0/7(0%)

Query 4 LIYWDDD 10  
LIYW+DD  
Sbjct 25 LIYWDDD 31

Could not find ABR3

**G3TWA7**

paratome\_1\_tr\_G3TWA7\_G3TWA7\_LOXAF\_Ig\_like\_domain\_containing\_protein\_OS\_Loxodonta\_afri  
cana\_OX\_9785\_PE\_4\_SV\_1

Could not find ABR1

**ABR L2: LLIYDASNRAS (74-84)**

RID: 62VZ5E5M016

Job Title:L2

Program: BLASTP

Query: L2 ID: lcl|Query\_46397(amino acid) Length: 11

Database: nr All non-redundant GenBank CDS

translations+PDB+SwissProt+PIR+PRF excluding environmental samples from WGS  
projects

Sequences producing significant alignments:

| Description                                                                        | Scientific<br>Name | Common<br>Name | Taxid  | Max<br>Score | Total<br>Score | Query<br>cover | E<br>Value | Per.<br>Ident | Acc.<br>Len |
|------------------------------------------------------------------------------------|--------------------|----------------|--------|--------------|----------------|----------------|------------|---------------|-------------|
| Accession<br>LuxR family transcriptional regulator [Mycobacterium...<br>BBX61765.1 | Mycobacteriu...    | NA             | 220927 | 25.7         | 25.7           | 100%           | 18         | 60.00         | 979         |

Alignments:

>LuxR family transcriptional regulator [Mycobacterium  
saskatchewanense]

Sequence ID: BBX61765.1 Length: 979

Range 1: 176 to 190

Score:25.7 bits(53), Expect:18,  
Method:  
Identities:9/15(60%), Positives:9/15(60%), Gaps:4/15(26%)

Query 1 LLIYDASN---RAS 11  
LLIYDA RAS  
Sbjct 176 LLIYDAASTLLERAS 190

Could not find ABR3

**G3TVW0**

paratome\_1\_tr\_G3TVW0\_G3TVW0\_LOXAF\_Ig\_like\_domain\_containing\_protein\_OS\_Loxodonta\_afri  
cana\_OX\_9785\_PE\_4\_SV\_1

Could not find ABR1

**ABR L2: LLIYDASSRAS (75-85)**

RID: 62W6CRYA013

Job Title:L2

Program: BLASTP

Query: L2 ID: lcl|Query\_74216(amino acid) Length: 11

Database: nr All non-redundant GenBank CDS

translations+PDB+SwissProt+PIR+PRF excluding environmental samples from WGS  
projects

Sequences producing significant alignments:

| Description                                                                        | Scientific<br>Name | Common<br>Name | Taxid  | Max<br>Score | Total<br>Score | Query<br>cover | E<br>Value | Per.<br>Ident | Acc.<br>Len |
|------------------------------------------------------------------------------------|--------------------|----------------|--------|--------------|----------------|----------------|------------|---------------|-------------|
| Accession<br>LuxR family transcriptional regulator [Mycobacterium...<br>BBX61765.1 | Mycobacteriu...    | NA             | 220927 | 28.2         | 28.2           | 100%           | 2.2        | 66.67         | 979         |

## Alignments:

>LuxR family transcriptional regulator [Mycobacterium saskatchewanense]

Sequence ID: BBX61765.1 Length: 979

Range 1: 176 to 190

Score:28.2 bits(59), Expect:2.2,  
Method:  
Identities:10/15(67%), Positives:10/15(66%), Gaps:4/15(26%)

Query 1 LLIYDASS----RAS 11  
Sbjct 176 LLIYDA S RAS  
LLIYDAASTLLERAS 190

Could not find ABR3

## G3TT51

paratome\_1\_tr\_G3TT51\_G3TT51\_LOXAF\_Ig\_like\_domain\_containing\_protein\_OS\_Loxodonta\_africana\_OX\_9785\_PE\_4\_SV\_1

Could not find ABR1

## ABR L2: LLIYGASSRASR (70-81)

RID: 62W75XZ301R

Job Title:L2

Program: BLASTP

Query: L2 ID: lcl|Query\_193298(amino acid) Length: 12

Database: nr All non-redundant GenBank CDS

translations+PDB+SwissProt+PIR+PRF excluding environmental samples from WGS projects

## Sequences producing significant alignments:

| Description                                                                        | Scientific Name | Common Name | Taxid  | Max Score | Total Query Score | cover | E Value | Per. Ident | Acc. Len |
|------------------------------------------------------------------------------------|-----------------|-------------|--------|-----------|-------------------|-------|---------|------------|----------|
| Accession<br>LuxR family transcriptional regulator [Mycobacterium...<br>BBX61765.1 | Mycobacteriu... | NA          | 220927 | 26.9      | 44.1              | 100%  | 7.6     | 62.50      | 979      |

## Alignments:

>LuxR family transcriptional regulator [Mycobacterium saskatchewanense]

Sequence ID: BBX61765.1 Length: 979

Range 1: 176 to 191

Score:26.9 bits(56), Expect:7.6,  
Method:  
Identities:10/16(63%), Positives:10/16(62%), Gaps:4/16(25%)

Query 1 LLIYGASS----RASR 12  
Sbjct 176 LLIY A S RASR  
LLIYDAASTLLERASR 191

Could not find ABR3

## G3TVJ6

paratome\_1\_tr\_G3TVJ6\_G3TVJ6\_LOXAF\_Ig\_like\_domain\_containing\_protein\_OS\_Loxodonta\_africana\_OX\_9785\_PE\_4\_SV\_1

Could not find ABR1

## ABR L2: LLIYEASNRAS (72-82)

RID: 62WC16FZ013

Job Title:L2

Program: BLASTP

Query: L2 ID: lcl|Query\_11729(amino acid) Length: 11

Database: nr All non-redundant GenBank CDS

translations+PDB+SwissProt+PIR+PRF excluding environmental samples from WGS projects

## Sequences producing significant alignments:

| Description                                                                     | Scientific Name | Common Name | Taxid  | Max Score | Total Query Score | cover | E Value | Per. Ident | Acc. Len |
|---------------------------------------------------------------------------------|-----------------|-------------|--------|-----------|-------------------|-------|---------|------------|----------|
| Accession<br>hypothetical protein [Mycobacterium colombiense]<br>WP_076051897.1 | Mycobacteriu... | NA          | 339268 | 25.7      | 25.7              | 100%  | 18      | 72.73      | 390      |

## Alignments:

```
>hypothetical protein [Mycobacterium colombiense]
Sequence ID: WP_076051897.1 Length: 390
>hypothetical protein A5739_08795 [Mycobacterium colombiense]
Sequence ID: OMC33428.1 Length: 390
```

Range 1: 135 to 145

Score:25.7 bits(53), Expect:18,  
Method:  
Identities:8/11(73%), Positives:9/11(81%), Gaps:0/11(0%)

```
Query 1    LLIYEASNRAS 11
        L I+EA NRAS
Sbjct 135  LWIFEATNRAS 145
```

## ABR L3: FQNY (115-119)

RID: 62WD1HTK013

Job Title:L3

Program: BLASTP

Query: L3 ID: lcl|Query\_20252(amino acid) Length: 5

Database: nr All non-redundant GenBank CDS

translations+PDB+SwissProt+PIR+PRF excluding environmental samples from WGS projects

## Sequences producing significant alignments:

| Description                                                                       | Scientific Name | Common Name | Taxid | Max Score | Total Query Score | E Value | Per. Ident | Acc. Len    |
|-----------------------------------------------------------------------------------|-----------------|-------------|-------|-----------|-------------------|---------|------------|-------------|
| Accession<br>type I site-specific deoxyribonuclease, HsdR family...<br>SGD45129.1 | Mycobacteriu... | NA          | 1773  | 22.3      | 22.3              | 100%    | 73         | 100.00 1040 |
| type I restriction endonuclease subunit R [Mycobacterium...<br>WP_065474021.1     | Mycobacteriu... | NA          | 1780  | 22.3      | 22.3              | 100%    | 73         | 100.00 1033 |

## Alignments:

```
>type I site-specific deoxyribonuclease, HsdR family
[Mycobacterium tuberculosis]
Sequence ID: SGD45129.1 Length: 1040
```

Range 1: 636 to 640

Score:22.3 bits(45), Expect:73,  
Method:  
Identities:5/5(100%), Positives:5/5(100%), Gaps:0/5(0%)

```
Query 1    FQNY 5
        FQNY
Sbjct 636  FQNY 640
```

```
>type I restriction endonuclease subunit R [Mycobacterium
malmoense]
```

Sequence ID: WP\_065474021.1 Length: 1033

```
>DEAD/DEAH box helicase [Mycobacterium malmoense]
```

Sequence ID: OCB21517.1 Length: 1033

Range 1: 677 to 681

Score:22.3 bits(45), Expect:73,  
Method:  
Identities:5/5(100%), Positives:5/5(100%), Gaps:0/5(0%)

```
Query 1    FQNY 5
        FQNY
Sbjct 677  FQNY 681
```

## Ig proteins underrepresented in TB+ elephants

### G3UIN4

paratome\_1\_tr\_G3UIN4\_G3UIN4\_LOXAF\_Ig\_like\_domain\_containing\_protein\_OS\_Loxodonta\_africana\_OX\_9785\_PE\_4\_SV\_1

#### ABR L1: QSLFDSSDKKDYLN (27-40)

RID: 62WE6VB3016

Job Title:L1

Program: BLASTP

Query: L1 ID: lcl|Query\_11081(amino acid) Length: 14

Database: nr All non-redundant GenBank CDS

translations+PDB+SwissProt+PIR+PRF excluding environmental samples from WGS projects

#### Sequences producing significant alignments:

| Description                                          | Scientific Name | Common Name | Taxid   | Max Score | Total Score | Query cover | E Value | Per. Ident | Acc. Len |
|------------------------------------------------------|-----------------|-------------|---------|-----------|-------------|-------------|---------|------------|----------|
| Accession                                            |                 |             |         |           |             |             |         |            |          |
| RND family transporter [Mycobacterium sp. E2479]     | Mycobacteriu... | NA          | 1834134 | 26.5      | 45.8        | 92%         | 16      | 72.73      | 954      |
| WP_067937080.1                                       |                 |             |         |           |             |             |         |            |          |
| restriction endonuclease [Mycobacterium sp. KBS0706] | Mycobacteriu... | NA          | 2578109 | 26.5      | 44.1        | 78%         | 16      | 75.00      | 1376     |
| TSD87553.1                                           |                 |             |         |           |             |             |         |            |          |

#### Alignments:

>Resistance-nodulation-division (RND) family transporter

[Mycobacterium sp. E2479]

Sequence ID: WP\_067937080.1 Length: 954

Membrane protein, transporter, associated to drug resistance

>hypothetical protein A5686\_08675 [Mycobacterium sp. E2479]

Sequence ID: OBH53630.1 Length: 954

Range 1: 590 to 600

Score:26.5 bits(55), Expect:16,

Method:

Identities:8/11(73%), Positives:8/11(72%), Gaps:0/11(0%)

```
Query 1 QSLFDSSDKKD 11
      QSLFD DK D
Sbjct 590 QSLFDATDKID 600
```

Range 2: 669 to 680

Score:19.3 bits(38), Expect:6160,

Method:

Identities:8/13(62%), Positives:8/13(61%), Gaps:4/13(30%)

```
Query 4 FDSSDKKD---YL 13
      FDSS K D YL
Sbjct 669 FDSS-KNDEFFYL 680
```

>restriction endonuclease/methylase [Mycobacterium sp. KBS0706]

Sequence ID: TSD87553.1 Length: 1376

Range 1: 867 to 878

Methylation, anti-mycobacterial activity in response to vaccination correlates with altered DNA methylation

Score:26.5 bits(55), Expect:16,

Method:

Identities:9/12(75%), Positives:9/12(75%), Gaps:2/12(16%)

```
Query 3 LFDSSD--KKDY 12
      LFDSSD KDY
Sbjct 867 LFDSSDPLTKDY 878
```

Range 2: 737 to 742

Score:17.6 bits(34), Expect:25377,

Method:

Identities:5/6(83%), Positives:5/6(83%), Gaps:0/6(0%)

```
Query 2 SLFDSS 7
      SLFD S
Sbjct 737 SLFDGS 742
```

#### ABR L2: LLIYLASKRDS (52-62)

RID: 62WS463J013

Job Title:L2

Program: BLASTP

Query: L2 ID: lcl|Query\_21455(amino acid) Length: 11



Database: nr All non-redundant GenBank CDS  
translations+PDB+SwissProt+PIR+PRF excluding environmental samples from WGS  
projects

Sequences producing significant alignments:

| Description                                                                       | Scientific<br>Name | Common<br>Name | Taxid | Max<br>Score | Total<br>Score | Query<br>cover | E<br>Value | Per.<br>Ident | Acc.<br>Len |
|-----------------------------------------------------------------------------------|--------------------|----------------|-------|--------------|----------------|----------------|------------|---------------|-------------|
| Accession<br>protein translocase subunit SecD [Mycobacterium sp.]<br>MBV9350256.1 | Mycobacteriu...    | NA             | 1785  | 24.8         | 24.8           | 63%            | 36         | 100.00        | 609         |

Alignments:

>protein translocase subunit SecD [Mycobacterium sp.]

Sequence ID: MBV9350256.1 Length: 609

Range 1: 563 to 569

Transmembrane transport, cell inner membrane, secretion of  
mycobacterial proteins linked to pathogenicity

Score:24.8 bits(51), Expect:36,  
Method:  
Identities:7/7(100%), Positives:7/7(100%), Gaps:0/7(0%)

Query 2 LIYLASK 8  
LIYLASK  
Sbjct 563 LIYLASK 569

Could not find ABR3

### Additional file 3. Gene Ontology (GO) annotations for non-immunoglobulin proteins.

#### Analytical workflow

1. Select non-immunoglobulin protein sequences differentially represented in TB+ elephants when compared to TB- animals.
2. Uniprot (<https://www.uniprot.org>) GO annotations for Molecular function, Biological process, and Subcellular localization in human homolog proteins.

| <b>Proteins overrepresented in TB+ elephants</b> |                      |                                                                                                                                                                                                                                                                           |
|--------------------------------------------------|----------------------|---------------------------------------------------------------------------------------------------------------------------------------------------------------------------------------------------------------------------------------------------------------------------|
| <b>Proteins identified</b>                       | <b>Human homolog</b> | <b>GO annotations:<br/>Molecular function (MF)<br/>Biological process (BP)<br/>Subcellular localization (CC)</b>                                                                                                                                                          |
| Christmas factor (F9)                            | P00740               | MF: Calcium ion binding, endopeptidase<br>BP: Blood coagulation, proteolysis<br>CC: Extracellular region or secreted                                                                                                                                                      |
| Glycoprotein V platelet (GP5)                    | P40197               | MF: Platelet adhesion to blood vessels<br>BP: Blood coagulation, cell adhesion, positive regulation of platelet activation<br>CC: Membrane                                                                                                                                |
| Apolipoprotein C-III (APOC3)                     | P02656               | MF: Cholesterol binding, lipase inhibitor, lipoprotein binding<br>BP: Negative regulation of lipid metabolism and low-density lipoprotein particle clearance<br>CC: Secreted                                                                                              |
| Apolipoprotein B (APOB)                          | P04114               | MF: Cholesterol transfer, heparin/lipase/phospholipid binding<br>BP: Artery morphogenesis, fertilization, positive regulation of cholesterol metabolism and gene expression, response to virus<br>CC: Extracellular region or secreted, cytoplasm                         |
| Apolipoprotein D (APOD)                          | P05090               | MF: Cholesterol binding, lipid transport<br>BP: Aging, glucose and lipid metabolism, negative regulation of cytokines involved in inflammatory response and T cell migration, response to axon injury and reactive oxygen species<br>CC: Extracellular region or secreted |
| Joining chain of multimeric IgA and IgM (JCHAIN) | P01591               | MF: Antigen binding, IgA binding<br>BP: Adaptive and humoral immune response, antibacterial humoral response<br>CC: Secreted                                                                                                                                              |
| Immunoglobulin heavy constant mu (IGHM)          | P01871               | MF: Antigen binding<br>BP: Adaptive and innate immune response, antibacterial humoral response<br>CC: Extracellular region or secreted, plasma membrane                                                                                                                   |

|                                                                                      |        |                                                                                                                                                                                                                                  |
|--------------------------------------------------------------------------------------|--------|----------------------------------------------------------------------------------------------------------------------------------------------------------------------------------------------------------------------------------|
| Biotinidase (BTD)                                                                    | P43251 | MF: Biotinidase activity<br>BP: Biotin metabolism, central nervous system development<br>CC: Extracellular region or secreted                                                                                                    |
| Tenascin C (TNC)                                                                     | P24821 | MF: Extracellular matrix structural constituent<br>BP: Cell adhesion, positive regulation of gene expression, regulation of cell growth and inflammatory response, response to wounding<br>CC: Extracellular region or secreted  |
| CD5 molecule like (CD5L)                                                             | O43866 | MF: Scavenger receptor activity, endopeptidase<br>BF: Immune cellular defense response, apoptosis, inflammatory response<br>CC: Extracellular region or secreted, cytoplasm                                                      |
| Glycosyl-phosphatidylinositol-specific phospholipase D (GPLD1)                       | P80108 | MF: Sodium channel regulator activity<br>BP: Positive regulation of apoptosis, cellular response to pH, cholesterol, calcium and insulin<br>CC: Extracellular region or secreted                                                 |
| Complement C5 (C5)                                                                   | P01031 | MF: Chemokine, endopeptidase inhibitor and signaling receptor activity<br>BP: Complement activation, inflammatory response, positive regulation of angiogenesis and chemokine production<br>CC: Extracellular region or secreted |
| <b>Proteins underrepresented in TB+ elephants (overrepresented in TB- elephants)</b> |        |                                                                                                                                                                                                                                  |
| Alpha-1-B glycoprotein (A1BG)                                                        | P04217 | MF: Platelet and neutrophil degranulation<br>BP: Leukocyte immunoglobulin-like receptor<br>CC: Extracellular region or secreted                                                                                                  |
| Serpin family A1 (SERPINA1) Encoding Alpha-1 antitrypsin (AAT)                       | P01009 | MF: Serin-type endopeptidase inhibitor activity<br>BP: Acute-phase response, blood coagulation, negative regulation of endopeptidase activity<br>CC: Extracellular region or secreted, endoplasmic reticulum                     |
| Transthyretin (TTR)                                                                  | P02766 | MF: Hormone activity, thyroid hormone binding<br>BP: Purine nucleobase and retinol metabolic processes, thyroid hormone transport<br>CC: Extracellular region or secreted, cytoplasm                                             |
| Keratin 10 (KRT10)                                                                   | P60014 | MF: Identical protein binding<br>BP: Formation of rigid and resistant hair<br>CC: Cytoskeleton                                                                                                                                   |

## Additional file 4. Most significant pathways identified by Reactome analysis of non-immunoglobulin proteins.

### Analytical workflow

1. Select non-immunoglobulin protein sequences differentially represented in TB+ elephants when compared to TB- animals.
2. Reactome (<https://reactome.org/PathwayBrowser/>) identification and characterization of biological pathways. As disclosed in the webpage, Reactome is a curated database of pathways and reactions in human biology. Reactions are considered as pathway 'steps'. Reactome defines a 'reaction' as any event in biology that changes the state of a biological molecule. Binding, activation, translocation, degradation and classical biochemical events involving a catalyst are all reactions. Reactome's annotated data describe reactions possible if all annotated proteins and small molecules were present and active simultaneously in a cell. By overlaying an experimental dataset on these annotations, a pathway over-representation analysis can be done. A binomial test is used to calculate the probability shown for each result, and the p-values are corrected for the multiple testing (Benjamini–Hochberg procedure) that arises from evaluating the submitted list of identifiers against every pathway. This is an overrepresentation analysis: A statistical (hypergeometric distribution) test that determines whether certain Reactome pathways are over-represented (enriched) in the submitted data. It answers the question ‘Does my list contain more proteins for pathway X than would be expected by chance?’ This test produces a probability score, which is corrected for false discovery rate using the Benjamini-Hochberg method.

| Proteins overrepresented in TB+ elephants                                    |                 |         |       |                       |                                                                   |
|------------------------------------------------------------------------------|-----------------|---------|-------|-----------------------|-------------------------------------------------------------------|
| Pathways                                                                     | Found Ratio     | p<0.05  | FDR   | Reactions Found Ratio | Proteins identified                                               |
| Defective F9 activation                                                      | 2/7<br>4.6e-04  | 1.4e-05 | 0.001 | 1/1<br>7.2e-05        | Christmas factor (F9)<br>Glycoprotein V<br>platelet (GP5)         |
| Defective F9 causes hemophilia B                                             | 2/13<br>8.6e-04 | 4.9e-05 | 0.002 | 4/4<br>2.9e-04        | F9, GP5                                                           |
| Chylomicron assembly                                                         | 2/14<br>2.3e-04 | 5.6e-05 | 0.002 | 5/5<br>3.6e-04        | Apolipoprotein C-III (APOC3)<br>Apolipoprotein B (APOB)           |
| Chylomicron remodeling                                                       | 2/21<br>0.001   | 8.3e-05 | 0.002 | 3/3<br>2.2e-04        | APOC3, APOB                                                       |
| Defects of contact activation system (CAS) and kallikrein/kinin system (KKS) | 2/21<br>0.001   | 1.3e-04 | 0.002 | 6/18<br>0.001         | F9, GP5                                                           |
| Diseases of hemostasis                                                       | 2/21<br>0.001   | 1.3e-04 | 0.002 | 6/18<br>0.001         | F9, GP5                                                           |
| Intrinsic pathway of fibrin clot formation                                   | 2/26<br>0.002   | 1.9e-04 | 0.003 | 8/24<br>0.002         | F9, GP5                                                           |
| Hemostasis                                                                   | 5/803<br>0.053  | 2.4e-04 | 0.003 | 23/334<br>0.024       | F9, GP5, APOB<br>Joining chain of multimeric IgA and IgM (JCHAIN) |

|                                                                                   |                    |                |             |                              |                                                                                   |
|-----------------------------------------------------------------------------------|--------------------|----------------|-------------|------------------------------|-----------------------------------------------------------------------------------|
|                                                                                   |                    |                |             |                              | Immunoglobulin heavy constant mu (IGHM)                                           |
| Plasma lipoproteins assembly                                                      | 2/30<br>0.002      | 2.6e-04        | 0.003       | 10/19<br>0.001               | APOC3, APOB                                                                       |
| Formation of fibrin clot (clotting cascade)                                       | 2/43<br>0.003      | 5.2e-04        | 0.005       | 9/61<br>0.004                | F9, GP5                                                                           |
| Defective F9 secretion                                                            | 1/1<br>6.6e-05     | 7.9e-04        | 0.007       | 1/1<br>7.2e-05               | F9                                                                                |
| Plasma lipoprotein remodeling                                                     | 2/56<br>0.004      | 8.8e-04        | 0.007       | 6/31<br>0.002                | APOC3, APOB                                                                       |
| Cell surface interactions at the vascular wall                                    | 3/257<br>0.017     | 9.7e-04        | 0.007       | 3/65<br>0.005                | APOB, JCHAIN                                                                      |
| NR1H3 & NR1H2 regulate gene expression linked to cholesterol transport and efflux | 2/66<br>0.004      | 0.001          | 0.009       | 2/40<br>0.003                | Apolipoprotein D (APOD)                                                           |
| Defective BTBD causes biotinidase deficiency                                      | 1/2<br>1.3e-04     | 0.002          | 0.009       | 2/2<br>1.4e-04               | Biotinidase (BTBD)                                                                |
| Retinoid metabolism transport                                                     | 2/79<br>0.005      | 0.002          | 0.009       | 9/28<br>0.002                | APOC3, APOB                                                                       |
| NR1H2 and NR1H3-mediated signaling                                                | 2/85<br>0.006      | 0.002          | 0.01        | 2/60<br>0.004                | APOD                                                                              |
| Metabolism of fat-soluble vitamins                                                | 2/89<br>0.006      | 0.002          | 0.011       | 9/34<br>0.002                | APOC3, APOB                                                                       |
| Plasma lipoprotein assembly, remodeling, and clearance                            | 2/102<br>0.007     | 0.003          | 0.012       | 30/85<br>0.006               | APC3, APOB                                                                        |
| Metabolism of vitamins and cofactors                                              | 3/382<br>0.025     | 0.003          | 0.012       | 11/204<br>0.015              | APOC3, APOB                                                                       |
| Defective cofactor function of FVIIIa variant                                     | 1/4<br>2.6e-04     | 0.003          | 0.012       | 1/1<br>7.2e-05               | APOC3, APOB, BTBD                                                                 |
| Defective F9 causes thrombophilia                                                 | 1/4<br>2.6e-04     | 0.003          | 0.012       | 1/1<br>7.2e-05               | F9                                                                                |
| Defective F9 variant does not activate FX                                         | 1/4<br>2.6e-04     | 0.003          | 0.012       | 1/1<br>7.2e-05               | F9                                                                                |
| Post-translational protein phosphorylation                                        | 2/109<br>0.007     | 0.003          | 0.012       | 1/1<br>7.2e-05               | Tenascin C (TNC)<br>APOB                                                          |
| Defective gamma-carboxylation of F9                                               | 1/5<br>3.3e-04     | 0.004          | 0.012       | 1/1<br>7.2e-05               | F9                                                                                |
| <b>Proteins underrepresented in TB+ elephants</b>                                 |                    |                |             |                              |                                                                                   |
| <b>Pathway</b>                                                                    | <b>Found Ratio</b> | <b>p-value</b> | <b>FDR*</b> | <b>Reactions Found Ratio</b> | <b>Proteins identified</b>                                                        |
| Neutrophil degranulation                                                          | 3/480<br>0.041     | 0.001          | 0.019       | 3/10<br>7.2e-04              | Alpha-1-B glycoprotein (A1BG)<br>Serp family A1 (SERPINA1)<br>Transthyretin (TTR) |
| Platelet degranulation                                                            | 2/128<br>0.011     | 0.002          | 0.019       | 1/11<br>8.0e-04              | A1BG, SERPINA1                                                                    |
| Formation of the cornified envelope                                               | 2/129<br>0.011     | 0.002          | 0.019       | 8/27<br>0.002                | Keratin 10 (KRT10)                                                                |
| Response to elevated platelet cytosolic Ca <sup>2+</sup>                          | 2/133<br>0.011     | 0.002          | 0.019       | 1/14<br>0.001                | A1BG, SERPINA1                                                                    |

|                                                        |                 |       |       |                 |                     |
|--------------------------------------------------------|-----------------|-------|-------|-----------------|---------------------|
| Hemostasis                                             | 3/726<br>0.063  | 0.004 | 0.027 | 7/334<br>0.024  | A1BG, SERPINA1      |
| Keratinization                                         | 2/217<br>0.019  | 0.005 | 0.027 | 15/34<br>0.002  | KRT10               |
| Retinoid cycle disease events                          | 1/13<br>0.001   | 0.007 | 0.027 | 1/16<br>0.001   | TTR                 |
| Diseases of the neuronal system                        | 1/13<br>0.001   | 0.007 | 0.027 | 1/17<br>0.001   | TTR                 |
| Diseases associated with visual transduction           | 1/13<br>0.001   | 0.007 | 0.027 | 1/17<br>0.001   | TTR                 |
| Platelet activation, signaling and aggregation         | 2/265<br>0.023  | 0.007 | 0.029 | 1/116<br>0.008  | A1BG, SERPINA1      |
| Common pathway of fibrin clot formation                | 1/22<br>0.002   | 0.011 | 0.034 | 4/29<br>0.002   | SERPINA1            |
| The canonical retinoid cycle in rods (twilight vision) | 1/23<br>0.002   | 0.012 | 0.034 | 2/25<br>0.002   | TTR                 |
| Intrinsic pathway of fibrin clot formation             | 1/23<br>0.002   | 0.012 | 0.034 | 2/24<br>0.002   | SERPINA1            |
| Cargo concentration in the ER                          | 1/33<br>0.003   | 0.017 | 0.034 | 2/12<br>8.7e-04 | SERPINA1            |
| Innate immune system                                   | 3/1195<br>0.103 | 0.017 | 0.034 | 3/170<br>0.051  | A1BG, SERPINA1, TTR |
| Formation of fibrin clot (clotting cascade)            | 1/39<br>0.003   | 0.02  | 0.035 | 6/61<br>0.004   | SERPINA1            |
| Retinoid metabolism and transport                      | 1/44<br>0.004   | 0.023 | 0.035 | 1/28<br>0.002   | TTR                 |
| Metabolism of fat-soluble vitamins                     | 1/48<br>0.004   | 0.025 | 0.035 | 1/34<br>0.002   | TTR                 |
| Non-integrin membrane-ECM interactions                 | 1/59<br>0.005   | 0.03  | 0.035 | 1/22<br>0.002   | TTR                 |
| COPII-mediated vesicle transport                       | 1/68<br>0.006   | 0.035 | 0.035 | 10/16<br>0.001  | SERPINA1            |
| Amyloid fiber formation                                | 1/81<br>0.007   | 0.041 | 0.041 | 2/33<br>0.002   | TTR                 |

\*FDR, False discovery rate.

# Additional file 5. Protein sequence alignment between *M. tuberculosis* P9WNK5|ESXB\_MYCTU ESAT-6-like protein EsxB and identified mycobacterial proteins with predicted antigen binding regions to immunoglobulin proteins.

## Analytical workflow

1. Select immunoglobulin protein sequences differentially represented in TB+ elephants when compared to TB- animals.
2. COBALT (<https://www.ncbi.nlm.nih.gov/tools/cobalt/cobalt.cgi?CMD=Web>) protein sequence alignment between identified mycobacterial proteins with predicted antigen binding regions to immunoglobulin proteins and *M. tuberculosis* P9WNK5|ESXB\_MYCTU ESAT-6-like protein EsxB identified as highly reactive to antibodies in infected elephants (Lyashchenko et al., 2018).

```
>sp|P9WNK5|ESXB_MYCTU ESAT-6-like protein EsxB OS=Mycobacterium tuberculosis (strain ATCC 25618 / H37Rv) OX=83332 GN=esxB PE=1 SV=1
MAEMKTDAAATLAQEAGNFERISGDLKTQIDQVESTAGSLQGQWRGAAGTAAQAAVVRVFQEAANKQKQELDEISTN
IRQAGVQYSRADEEQQALSSQMGF
```

## Ig proteins overrepresented in TB+ elephants

NCBI Multiple Sequence Alignment Viewer, Version 1.22.0

| Sequence ID    | Start | Alignment | End | Organism                    |
|----------------|-------|-----------|-----|-----------------------------|
| P9WNK5         | (+)   | 1         | 100 | Mycobacterium tubercul...   |
| WP_020822873.1 | (+)   | 1         | 234 | Mycobacterium intracellu... |

  

|                |   |                                                                                |    |
|----------------|---|--------------------------------------------------------------------------------|----|
| P9WNK5.1       | 1 | -----MAEMKTDAAATL                                                              | 11 |
| WP_020822873.1 | 1 | MARSLPSGWLRYYSDRNWNRQIVDLKSHQVNLVLDVGANAGQYGAGLRRATYKDRIVSFEPVSQPFVLEHEAAADPLW | 80 |

  

|                |    |                                                                                  |     |
|----------------|----|----------------------------------------------------------------------------------|-----|
| P9WNK5.1       | 12 | AQEAGNFERISGDLKTQIDQVESTAGSLQGQWRGAAGTAAQAAVVRFQEAANKQKQELD-EISTNIRQAGVQYSRADEEQ | 90  |
| WP_020822873.1 | 81 | ECRRHALGNIDGEISINVAGNAGQSSVGLMLKSHQDAFPPANYIGTEEVPMHRLDSVAAEIFRPTDVTFLKIDVQGFEK  | 160 |

  

|                |     |                                                                             |     |
|----------------|-----|-----------------------------------------------------------------------------|-----|
| P9WNK5.1       | 91  | QQALSSQMGF-----                                                             | 100 |
| WP_020822873.1 | 161 | EVLTTGGESTVRDRCVGMQIELSFLHLYEGDMLIHEALDLLHSMGFTLTGLLPGFADPRNGRMLQADGIFFREDD | 234 |

NCBI Multiple Sequence Alignment Viewer, Version 1.22.0

| Sequence ID | Start | Alignment | End | Organism                  |
|-------------|-------|-----------|-----|---------------------------|
| P9WNK5      | (+)   | 1         | 100 | Mycobacterium tubercul... |
| TAM68061.1  | (+)   | 1         | 264 | Mycobacterium sp.         |

  

|            |   |                                                                                   |    |
|------------|---|-----------------------------------------------------------------------------------|----|
| P9WNK5.1   | 1 | MAEMKTDAAATLAQEAGNFERISGDLKTQIDQVESTAGSLQGQWRGAAGTAAQAAVVRFQEAANKQKQELDEIST---NIR | 77 |
| TAM68061.1 | 1 | MRSFTVAASATALVLFGSAAIAAAPPKDYCAELKGANTGQACRIQMADAGYNVDISFPVSYDPDEKSVADFITKRRDDFL  | 80 |

  

|            |    |                                                                                 |     |
|------------|----|---------------------------------------------------------------------------------|-----|
| P9WNK5.1   | 78 | QAGVQYSRADEEQQALSS-QMGF-----                                                    | 100 |
| TAM68061.1 | 81 | NVAKSSAPRDQPYQLTISSANYGSAIPPRGTEAVVLKVVENVGAHPQTTFKSFNWDQTYRKAIVWTAADDKNNTPLWRV | 160 |

  

|            |     |                                                                                   |     |
|------------|-----|-----------------------------------------------------------------------------------|-----|
| P9WNK5.1   | 161 | DDPLQTVAPIVQSELQKQTAPPATPTPPAPPANQTQPPPPASPTQTTPPVVTIAPAAAYDPANYQNFAVTNDGVIFFFDQG | 240 |
| TAM68061.1 | 161 | -----                                                                             |     |

  

|            |     |                          |     |
|------------|-----|--------------------------|-----|
| P9WNK5.1   | 241 | RMLPDAAGATQVLVPRSAIDPMLA | 264 |
| TAM68061.1 | 241 | -----                    |     |

NCBI Multiple Sequence Alignment Viewer, Version 1.22.0

| Sequence ID    | Start | Alignment | End | Organism                  |
|----------------|-------|-----------|-----|---------------------------|
| P9WNK5         | (+)   | 1         | 100 | Mycobacterium tubercul... |
| WP_065128554.1 | (+)   | 1         | 164 | Mycobacterium asiaticum   |

  

|                |   |                                                                                   |    |
|----------------|---|-----------------------------------------------------------------------------------|----|
| P9WNK5.1       | 1 | -----MAEMKTDAAATLAQE-AGNFERISGDLKTQIDQVESTAGSLQGQWRG                              | 45 |
| WP_065128554.1 | 1 | MPLHLQAVAPADVSGARLALALNTVAPDPLATCRLAHPGGGALLLGLVGAASHVVTVEHGTTRFSEQVSC TAGDELPSRS | 80 |

  

|                |    |                                                                               |     |
|----------------|----|-------------------------------------------------------------------------------|-----|
| P9WNK5.1       | 46 | AAGTAAQAAVVRFQEAANKQ--KQELDEISTNIRQAGVQYSRADEEQQALSSQMGF-----                 | 100 |
| WP_065128554.1 | 81 | APGYWIEARTEKHGEASFRLASRLDRCAKEVGWLGIFFP-GDDAALTALAEAPDGNWQWQTWHLYPSSAGGTVVHTA | 159 |

  

|                |     |       |     |
|----------------|-----|-------|-----|
| P9WNK5.1       | 160 | SRWHP | 164 |
| WP_065128554.1 | 160 | ----- |     |

NCBI Multiple Sequence Alignment Viewer, Version 1.22.0

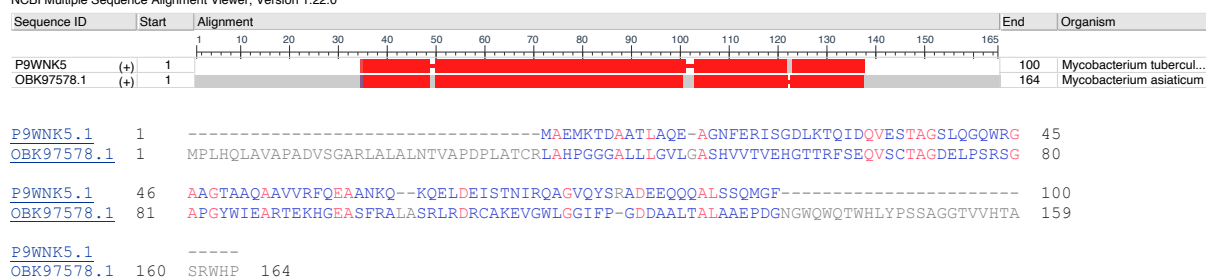

NCBI Multiple Sequence Alignment Viewer, Version 1.22.0

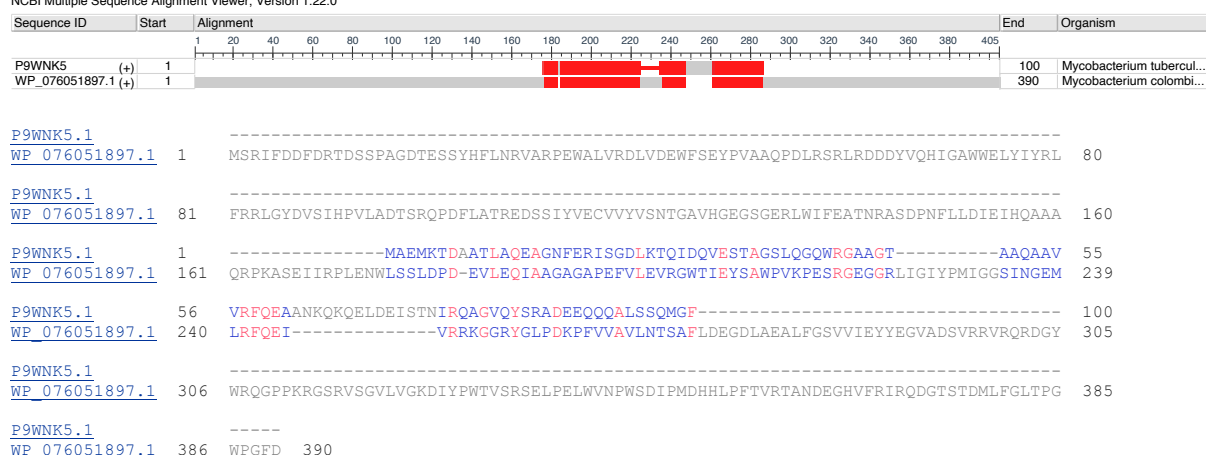

NCBI Multiple Sequence Alignment Viewer, Version 1.22.0

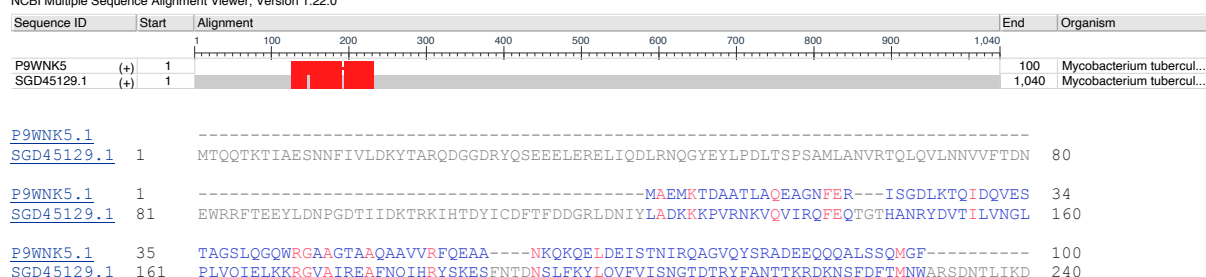

NCBI Multiple Sequence Alignment Viewer, Version 1.22.0

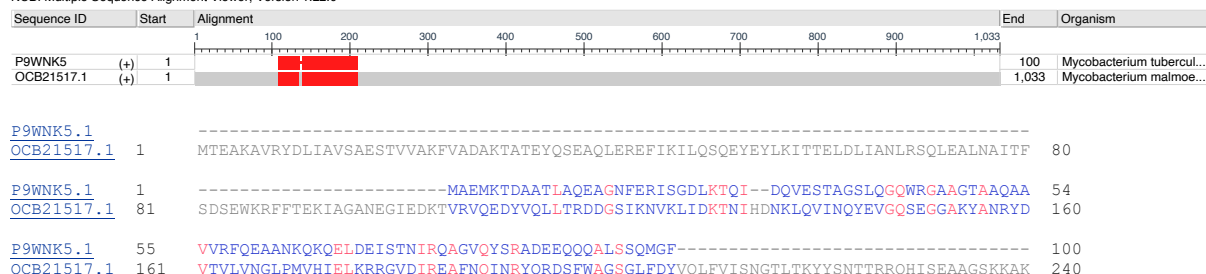



Ig protein underrepresented in TB+ elephants

NCBI Multiple Sequence Alignment Viewer, Version 1.22.0

| Sequence ID    | Start | Alignment                                                                    | End | Organism                  |
|----------------|-------|------------------------------------------------------------------------------|-----|---------------------------|
| P9WNK5         | (+)   | 1                                                                            |     |                           |
| WP_067937080.1 | (+)   | 1                                                                            |     |                           |
|                |       | 1 50 100 150 200 250 300 350 400 450 500 550 600 650 700 750 800 850 900 954 |     |                           |
|                |       |                                                                              | 100 | Mycobacterium tubercul... |
|                |       |                                                                              | 954 | Mycobacterium sp. E2479   |

  

|                |     |                                                                                  |     |     |
|----------------|-----|----------------------------------------------------------------------------------|-----|-----|
| P9WNK5.1       | 1   | -----                                                                            | MAE | 3   |
| WP_067937080.1 | 641 | ILTEHNTIVPQLAQLDELSRQMMDLGYAFDSSKNDEFFYLPPDAFSNPYFQIDLRFFVSPDGKAARYMVYHDGEALTPEG |     | 720 |

  

|                |     |                                                                                   |  |     |
|----------------|-----|-----------------------------------------------------------------------------------|--|-----|
| P9WNK5.1       | 4   | MKTDAAATLAQEAGNFERIS-GDLKTQIDQVESTAGSLQGQWRGAAGTAAQAAVVRFQEAANKQKQELDEISTNIRQAGVQ |  | 82  |
| WP_067937080.1 | 721 | IKHDQTYLPAAKEALKGTALAGARVYLGGAATYWDIQEAARMDLIIAATAAFALIFLVMLLITRSVIAALVIVGTVAFS   |  | 800 |

  

|                |     |                                                                                 |  |     |
|----------------|-----|---------------------------------------------------------------------------------|--|-----|
| P9WNK5.1       | 83  | YSRADEEQQALSSQMGF-----                                                          |  | 100 |
| WP_067937080.1 | 801 | YSGAFGLSVLVWQHFLGIPLSWLNLPLTFIILVAVGSDYNLLLVRYLEESKAGLNTGLIRAVANSKGVVTTAGLVFAVT |  | 880 |

NCBI Multiple Sequence Alignment Viewer, Version 1.22.0

| Sequence ID  | Start | Alignment                                        | End | Organism                  |
|--------------|-------|--------------------------------------------------|-----|---------------------------|
| P9WNK5       | (+)   | 1                                                |     |                           |
| MBV9350256.1 | (+)   | 1                                                |     |                           |
|              |       | 1 50 100 150 200 250 300 350 400 450 500 550 609 |     |                           |
|              |       |                                                  | 100 | Mycobacterium tubercul... |
|              |       |                                                  | 609 | Mycobacterium sp.         |

  

|              |     |                                                                                  |        |     |
|--------------|-----|----------------------------------------------------------------------------------|--------|-----|
| P9WNK5.1     | 1   | -----                                                                            | MAEMKT | 6   |
| MBV9350256.1 | 321 | KSAAADTWADFTA AHVGTQTAFTLDSRVVSAPQIREAIPGGRTQITGGDPPFTADTARQLANVLKYGSLPLSFESSEAE |        | 400 |

  

|              |     |                                                                                   |                      |     |
|--------------|-----|-----------------------------------------------------------------------------------|----------------------|-----|
| P9WNK5.1     | 7   | DAATLAQEAGNFERISGDLKTQIDQVESTAGSLQGQWRGAAGTAAQAAV-----                            | VRFQEAANKQKQELDEISTN | 75  |
| MBV9350256.1 | 401 | VSATLGLTSLRAGLITAGAIGLALVLLYSLAYYRVLGLLTALSLVASGAMVFAILVLLGRYINYTLDLAGIAGLIIGIGTT |                      | 480 |

  

|              |     |                                                                                  |  |     |
|--------------|-----|----------------------------------------------------------------------------------|--|-----|
| P9WNK5.1     | 76  | IRQAGVQYSRADEEQQALSSQMGF-----                                                    |  | 100 |
| MBV9350256.1 | 481 | ADSFVVFFERIKDEIREGRSFRSAVPRGWARARKTIVSGNAVTFLAAAVLYFLAIGQVKGFAFTLGLTTILDVVFVFLVT |  | 560 |
